# Supplementary material for: Improved simplified clinical algorithm for identifying patients eligible for immediate initiation of antiretroviral therapy for HIV (SLATE II): protocol for a randomized evaluation
Source: Trials. 2018 Oct 11;19:548. doi: 10.1186/s13063-018-2928-5 (PMC6180640; doi:10.1186/s13063-018-2928-5)

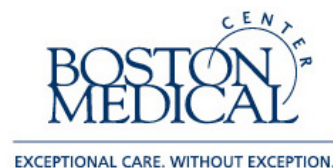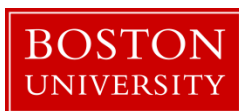

**Institutional Review Board**  
72 E. Concord St., Robinson 4 – Suite 414  
Boston, Massachusetts 02118-2307  
Tel: 617-638-7207

**Title of Study:** Randomized Evaluation of a Revised, Simplified Clinical Algorithm for Identifying Patients Eligible for Immediate Initiation of Antiretroviral Therapy for HIV (SLATE II--SIMPLIFIED ALGORITHM FOR TREATMENT ELIGIBILITY II)

**IRB Number:** H-37010

**RE:** Initial Review Submission Form

**Review Type:** Full Board

**Action:** Approved

**Date of Approval:** 11/17/2017

**Date of Expiration:** 11/16/2018

**Funding Source:** Bill and Melinda Gates Foundation

**Award #:** OPP1136158

November 17, 2017

Dear Sydney Rosen, MPA:

At the Panel Orange Institutional Review Board (IRB) meeting, chaired by David W. Kaufman, ScD, the Board reviewed the above-referenced submission and determined that it will meet the requirements for approval pending specific changes outlined in the Board's stipulations.

On 11/17/2017, the Chair determined that this study now meets the stipulations set forth by the IRB and is hereby approved. This approval is valid through the expiration date indicated above.

This approval corresponds with the versions of the application and attachments in the electronic system most recently approved as of the date of this letter. The approved version of the attached protocol is 1.1.

**Protocol Specific Determinations and Findings**

This study has been determined to be not greater than minimal risk under 45 CFR 46. This study will be reviewed as expedited in the future.

No PHI collected, accessed, used or distributed under 45 CFR 164.514.

Written consent will be obtained in accordance with 45 CF 46.116.

Alteration of consent for screening approved under 46.116(d).

Limited- and non-readers may be recruited.

As a principal investigator, you are reminded that you must comply with the responsibilities listed here <<http://www.bumc.bu.edu/irb/maintaining-irb-approval/responsibilities-of-the-principal-investigator/>>.

Sincerely yours,

Robert Terrano,  
Senior IRB Analyst

# University of the Witwatersrand, Johannesburg

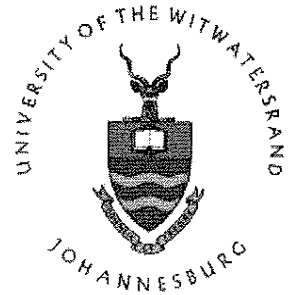

**Human Research Ethics Committee: (Medical)**  
FWA Registered No IRB 00001223

**SECRETARIAT:** Suite 189, Private Bag x2600, Houghton 2041, South Africa Tel: +27-11-274 9200 Fax: +27-11-274 9281

05 December 2017

**FAXED & COURIERED**

Ms N Moyo

Project Manager  
Health Economics and Epidemiology Research  
39 Empire Road  
Parktown  
2193

Fax: 086 668 0358

Dear Ms Moyo,

**PROTOCOL: SLATE II - RANDOMIZED EVALUATION OF A REVISED, SIMPLIFIED CLINICAL ALGORITHM FOR IDENTIFYING PATIENTS ELIGIBLE FOR IMMEDIATE INITIATION OF ANTIRETROVIRAL THERAPY FOR HIV (SLATE II - SIMPLIFIED ALGORITHM FOR TREATMENT ELIGIBILITY II)**

**ETHICS REFERENCE NO: 171011**

**RE : FINAL ETHICS APPROVAL**

This is to certify that the above-mentioned trial has been approved by the University of the Witwatersrand, Human Research Ethics Committee (HREC), and the Protocol/Expert Reviewer. Date of Meeting where trial was reviewed: 27 October 2017.

The University of the Witwatersrand, Human Research Ethics Committee Approval Granted for the above mentioned study is valid for five years. Where required by Sponsor to have approval on a more frequent basis it remains the responsibility of the Sponsor and Investigator to apply for continuing review and approval, or for the duration of the Trial.

**1. It is the responsibility of the Sponsor and Principal Investigator to ensure, where required, that relevant approvals are in place and compliance with the following is adhered to before a trial may begin:**

- If trial is being conducted in Provincial Health facilities: Approval from the Hospital CEO / Clinic Manager / District Research Committee (whichever is applicable) be obtained.
- The study is submitted onto The National Health Research Database (NHRD).
- The relevant approvals are uploaded onto the NHRD system: Ethics Approval, MCC Approval, Hospital CEO / Clinic Manager / District Research Committee Approval.

\* A copy of the MCC Approval and/or MCC Notification letter must be submitted to the Ethics Secretariat Office for record purposes (IF MCC APPROVAL / NOTIFICATION IS APPLICABLE).

\* The study is conducted according to the protocol submitted to the University of the Witwatersrand, Human Research Ethics Committee. Any amendments to the protocol must first be submitted to the Human Research Ethics Committee for approval.

\* During the study, the University of the Witwatersrand, Human Research Ethics Committee is informed immediately of :

- Any Unexpected Serious Adverse Events or Unexpected Adverse Drug Reactions, which, in the Investigator and/or the Sponsor's opinion are suspected to be related to the study drug. (Refer to POL-IEC-001 and SOP-IEC-005, Item 3.4).
- Any data received during the trial which, may cast doubt on the validity of the continuation of the study.

- \* The University of the Witwatersrand, Human Research Ethics Committee is notified of any decision to discontinue the study and the reason stated.
- \* The Investigators authorised by this approval participate in this study. Additional Investigators shall be submitted to the University of the Witwatersrand, Human Research Ethics Committee for approval prior to their participation in the study.
- \* In the event of an authorised Investigator ceasing to participate in the study, the University of the Witwatersrand, Human Research Ethics Committee must be informed and the reason for such cessation given.

## **2. PRINCIPLES OF INFORMED CONSENT:**

- \* The University of the Witwatersrand, Human Research Ethics Committee requires that in all studies, the Principles of Informed Consent are adhered to. This applies to volunteers as well as patients.

## **3. PROGRESS REPORTS:**

- \* The University of the Witwatersrand, Human Research Ethics Committee requests that the MCC Progress Reports be submitted twice a year either in March and September or six monthly from start of study to the HREC Secretariat Office - 011 274 9281 and a report of the final results, at the conclusion of the study. (IF APPLICABLE)

## **4. REIMBURSEMENT TO PATIENTS FOR TRANSPORT:**

- \* The Human Research Ethics Committee: (Medical) is in agreement that reimbursement per visit is according to the Medicines Control Council of SA and that reimbursement should be appropriate according to the situation.

## **5. TRANSPORT AND STORAGE OF BLOOD AND TISSUE SAMPLES IN SOUTH AFRICA:**

- \* If blood specimens are to be stored for future analysis and is planned that such analysis will be done outside Wits, then the blood must be stored at a facility in South Africa agreed with the relevant IRB, with release of sub-samples only once projects have been approved by the local Research Ethics Committee applicable to where the analysis will be done as well as by the Wits Human Research Ethics Committee: (Medical).

## **6. GENETIC TESTING:**

- \* The Human Research Ethics Committee: Medical; will not approve open-ended genetic testing as this does not fit the Human Research Ethics Committee criteria.

## **7. GOOD CLINICAL PRACTICE:**

- \* The South African Department of Health, Medicines Control Council requires Good Clinical Practice (GCP) Training for all Investigators in Clinical Trials, and that GCP training be renewed every three (3) years.

As yet, there are no National Guidelines for the content of GCP courses. Until these are available the Wits Human Research Ethics Committee (Medical) will note courses completed by Investigators without approval of the content of the individual courses.

## **8. THE SUPPORTING APPROVAL DOCUMENTS ARE ATTACHED:**

8.1 Ethics Approval Form signed by the Chairperson of the HREC - Kindly return the copy of the Approval Form signed by the Principal Investigator(s) per fax: 011 274 9281 for our records (this is applicable with the initial Approval).

8.2 List of members present at the HREC meeting held as per INDEPENDENT ETHICS COMMITTEE APPROVAL FORM

**9. WE AWAIT YOUR RESPONSES AS REQUESTED:** Ensure to have these documents forwarded at the earliest for the HREC records.

\* MCC Approval letter and/or letter of Notification before the above study may commence / or where an Amendment may be implemented (IF MCC APPROVAL / NOTIFICATION IS APPLICABLE). It remains the responsibility of the Principal Investigator and/or Sponsor to ensure that the relevant approvals are in place.

\* Copy of Independent Ethics Declaration Approval Form signed by the Principal Investigator. (this is applicable with the initial Approval).

\* Kindly forward the above to the undersigned at fax: 011 274 9281 at your earliest convenience.

The above has been noted for the Ethics Committee information and records.

**KINDLY FORWARD TO THE RELEVANT INVESTIGATORS / CRA / SPONSOR /  
STUDY CO-ORDINATORS - WHERE APPLICABLE**

Regards,

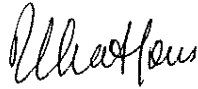

**PROF PETER CLEATON-JONES**

For and on behalf of the Human Research Ethics Committee: (Medical)

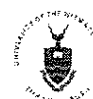

# INDEPENDENT ETHICS COMMITTEE APPROVAL FORM

|                      |        |                     |                                 |
|----------------------|--------|---------------------|---------------------------------|
| Ethics Reference No. | 171011 | Date of Meeting     | 27-Oct-2017                     |
|                      |        | Recertification Due | 26 October 2018 (If applicable) |

|                          |             |                |
|--------------------------|-------------|----------------|
| Principal Investigators: | Dr M Maskew | Investigators: |
|                          | Dr SB Rosen |                |

**Protocol Title:** Randomized Evaluation of a Revised, Simplified Clinical Algorithm for Identifying Patients Eligible for Immediate Initiation of Antiretroviral Therapy for HIV (SLATE II - SIMPLIFIED ALGORITHM FOR TREATMENT ELIGIBILITY II)

| DOCUMENTS REVIEWED               |                                                                                  | Tick As Appropriate |             | Yes                                 | No                                  |
|----------------------------------|----------------------------------------------------------------------------------|---------------------|-------------|-------------------------------------|-------------------------------------|
| Protocol Number                  | SLATE II                                                                         | Date:               | 05-Oct-2017 |                                     |                                     |
| Protocol                         | SLATE II Research Protocol - Version 1.0                                         | Date:               | 05-Oct-2017 | <input checked="" type="checkbox"/> | <input type="checkbox"/>            |
| Investigator's Brochure          | N/A - Version: N/A - Dated:                                                      |                     |             | <input checked="" type="checkbox"/> | <input type="checkbox"/>            |
| Subject Information/Consent Form | Research Information Form - Version: 1.2 - Dated: 16 Oct 2017                    |                     |             | <input checked="" type="checkbox"/> | <input type="checkbox"/>            |
|                                  | Information for Patients starting ART with TB Symptoms - Version: - - Dated:     |                     |             | <input checked="" type="checkbox"/> | <input type="checkbox"/>            |
| Advertisements                   | Advertisement: "Join the SLATE II Study" - Version: - - Dated:                   |                     |             | <input checked="" type="checkbox"/> | <input type="checkbox"/>            |
| Questionnaires                   | SLATE II ID Form (CRF Part 0) - Version: - - Dated: 05 Oct 2017                  |                     |             | <input checked="" type="checkbox"/> | <input type="checkbox"/>            |
|                                  | SLATE II Screening Form - Version: - - Dated: 05 Oct 2017                        |                     |             | <input checked="" type="checkbox"/> | <input type="checkbox"/>            |
|                                  | SLATE II CRF Lab Result and Tracing Form - Version: - - Dated: 05 Oct 2017       |                     |             | <input checked="" type="checkbox"/> | <input type="checkbox"/>            |
|                                  | SLATE II Referral Letter - Version: - - Dated: 06 Oct 2017                       |                     |             | <input checked="" type="checkbox"/> | <input type="checkbox"/>            |
|                                  | SLATE II CRF Adverse Event Reporting Form - Version: - - Dated: 05 Oct 2017      |                     |             | <input checked="" type="checkbox"/> | <input type="checkbox"/>            |
|                                  | SLATE II CRF Outcomes Form - Version: - - Dated: 06 Oct 2017                     |                     |             | <input checked="" type="checkbox"/> | <input type="checkbox"/>            |
|                                  | SLATE II TB tracing and questionnaire - Version: - - Dated: 06 Oct 2017          |                     |             | <input checked="" type="checkbox"/> | <input type="checkbox"/>            |
|                                  | SLATE II CRF Part 2 - Version: - - Dated: 06 Oct 2017                            |                     |             | <input checked="" type="checkbox"/> | <input type="checkbox"/>            |
|                                  | SLATE II CRF Part 1 - Version: - - Dated: 06 Oct 2017                            |                     |             | <input checked="" type="checkbox"/> | <input type="checkbox"/>            |
| Insurance/Compensation           | N/A                                                                              | Valid From          | To:         | <input type="checkbox"/>            | <input checked="" type="checkbox"/> |
| Synopsis of Study/Trial Summary  | SIMPLIFIED ALGORITHM FOR TREATMENT ELIGIBILITY II                                |                     |             | <input checked="" type="checkbox"/> | <input type="checkbox"/>            |
| Other Documentation              | Protocol Synopsis - Dated: 05 Oct 2017                                           |                     |             | <input checked="" type="checkbox"/> | <input type="checkbox"/>            |
|                                  | NHREC Trial Application ID#: 4852 - Dated: 05 Oct 2017                           |                     |             | <input checked="" type="checkbox"/> | <input type="checkbox"/>            |
|                                  | ClinicalTrials.gov Protocol Registration and Results System - Dated: 06 Oct 2017 |                     |             | <input checked="" type="checkbox"/> | <input type="checkbox"/>            |
|                                  | HREC Application Form - Dated: 06 Oct 2017                                       |                     |             | <input checked="" type="checkbox"/> | <input type="checkbox"/>            |
|                                  | Subcontract Scope of Work - Dated:                                               |                     |             | <input checked="" type="checkbox"/> | <input type="checkbox"/>            |
| Relevant Trial Hospital/(s)      | Jabulane Dumane Community Health Centre                                          |                     |             | <input checked="" type="checkbox"/> | <input type="checkbox"/>            |
|                                  | OR Tambo Clinic                                                                  |                     |             | <input checked="" type="checkbox"/> | <input type="checkbox"/>            |
|                                  | Alexandra Health Clinic                                                          |                     |             | <input checked="" type="checkbox"/> | <input type="checkbox"/>            |
|                                  | Health Economics and Epidemiology Research Office (HERO)                         |                     |             | <input checked="" type="checkbox"/> | <input type="checkbox"/>            |
| Syndicate and/or Research Unit   | Health Economics and Epidemiology Research Office (HERO)                         |                     |             | <input checked="" type="checkbox"/> | <input type="checkbox"/>            |

| DETAILS OF COMMITTEE                                                                                 |                                                                                                                                |
|------------------------------------------------------------------------------------------------------|--------------------------------------------------------------------------------------------------------------------------------|
| Name                                                                                                 | University of the Witwatersrand Human Research Ethics Committee: (Medical)                                                     |
| Address                                                                                              | Research Office, Senate House<br>University of the Witwatersrand, 1 Jan Smuts Avenue, BRAAMFONTEIN, Johannesburg, 2000         |
| DETAILS OF MEETING                                                                                   |                                                                                                                                |
| Is the Investigator a member of the committee ?                                                      | <input type="checkbox"/> Yes <input checked="" type="checkbox"/> No                                                            |
| If "Yes" did he/she vote ?                                                                           | <input type="checkbox"/> Yes <input checked="" type="checkbox"/> No                                                            |
| Is the Committee organised and operated according to applicable laws and regulations together with ? | <input checked="" type="checkbox"/> Yes <input type="checkbox"/> No                                                            |
| Local GCP requirements ?                                                                             | <input checked="" type="checkbox"/> Yes <input type="checkbox"/> No                                                            |
| ICH GCP requirements ?                                                                               | <input checked="" type="checkbox"/> Yes <input type="checkbox"/> No                                                            |
| FDA GCP requirements ? FWA Registered No. IRB00001223                                                | <input checked="" type="checkbox"/> Yes <input type="checkbox"/> No                                                            |
| Progress reports required either in March and September or six monthly from start of study ?         | <input checked="" type="checkbox"/> Yes <input type="checkbox"/> No                                                            |
| <b>DECISION ON APPROVAL : is approval given to conduct the trial ?</b>                               |                                                                                                                                |
| Yes - with no conditions                                                                             | <input checked="" type="checkbox"/> Tick As Appropriate                                                                        |
| Remarks :                                                                                            | Our expectation is that our requirements are fulfilled once a company has submitted and uploaded relevant approvals onto NHRD. |
| Yes - with conditions                                                                                | <input type="checkbox"/>                                                                                                       |
| Specify conditions :                                                                                 |                                                                                                                                |
| No                                                                                                   | <input type="checkbox"/>                                                                                                       |
| Specify reasons                                                                                      |                                                                                                                                |

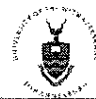

# INDEPENDENT ETHICS COMMITTEE APPROVAL FORM

## SIGNATURES

I confirm that the details on this form are correct:

Date

Name:

Prof PE Cleaton-Jones

Signature:

05 December 2017

Chair / Deputy Chair of Committee

## DECLARATION OF INVESTIGATOR/(S)

To be completed and ONE COPY returned to the Secretariat for the HREC at Wits Health Consortium, 8 Blackwood Avenue, Parktown, 2193 or Fax To: 011 274-9281

I/We fully understand the conditions under which I am/we are authorised to carry out and complete the above-mentioned research and I/we agree to ensure full compliance with these conditions. Should any amendment, alteration or departure be contemplated from the research procedure methodology or manner of execution, I/we will communicate with the Chairman of the Human Research Ethics Committee: (Medical) for approval prior to acting on any of the above mentioned proposed amendments, alterations or departures. I am/we are fully aware that any unauthorised amendment, alteration or departure as above will amount to misconduct and may lead to the institution of disciplinary procedures.

Any approval given by the HREC is conditional upon consent being obtained by the Investigator/s from the Superintendent (or equivalent official) of the Hospital, Clinic or Institution in which the research is, in part or full, to take place.

The Chairman may of course at his discretion place the matter before the full Committee.

DATE: \_\_\_\_\_ SIGNATURE: \_\_\_\_\_ NAME: \_\_\_\_\_

PROTOCOL NUMBER **SLATE II**

ETHICS REF.: **171011**

Date Printed 05 December 2017

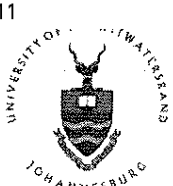

## HUMAN RESEARCH ETHICS COMMITTEE MEMBERS: (MEDICAL) UNIVERSITY OF THE WITWATERSRAND

**Attendance Register for the Ethics Meeting held on 27 October 2017 from 11:00 - 15:00**

**Venue: EXECUTIVE COMMITTEE ROOM, Ground Floor, Phillip V Tobias Building, Cnr York Road & 29 Princess of Wales Terrace**

### AFFILIATED TO THE UNIVERSITY OF THE WITWATERSRAND

| Surname       | Initials | Title | Discipline/s                   | Academic Qualifications                                                            | Gender | Present |
|---------------|----------|-------|--------------------------------|------------------------------------------------------------------------------------|--------|---------|
| Adam          | Y        | Dr    | Obstetrics & Gynaecology       | MB BCh; FCOG                                                                       | F      | Absent  |
| Cleaton-Jones | PE       | Prof  | Biomedical Ethics              | BDS; MB BCh; PhD; DA (SA); DTM&H; DSc (Dent), FCD (SA) DPH; PhD Hon Causa, MASSAfr | M      | Present |
| Conradie      | FM       | Dr    | Infectious Diseases/HIV/TB     | MB BCh; DTM&H; MSc; Dip HIV Man                                                    | F      | Present |
| Cooper        | PA       | Prof  | Paediatrics                    | MB BCh, PhD, DCH (SA), FCPaeds (SA)                                                | M      | Present |
| Dhai          | A        | Prof  | Biomedical Ethics              | MB ChB; FCOG; LLM; PGDiplntResEthics                                               | F      | Present |
| Donde         | B        | Prof  | Radiation Oncology             | MB BCh, MMed Rad (T)                                                               | M      | Absent  |
| Etheredge     | H        | Dr    | Biomedical Ethics              | MSc Med, BA; PhD                                                                   | F      | Present |
| Feldman       | C        | Prof  | Pulmonology                    | MB BCh, PhD, DSc, FCP (SA), FRCP                                                   | M      | Present |
| Gerrand       | P        | Dr    | Social Work                    | PhD (Social Work)                                                                  | F      | Present |
| Lowman        | W        | Dr    | Clinical Microbiology          | MB BCh, MMed, FC Path (SA) Micro                                                   | M      | Absent  |
| Lownie        | MA       | Prof  | Maxillo-Facial & Oral Surgery  | BDS, BA (Hons), DipMFOS, FCMFOS(SA), MEd                                           | F      | Absent  |
| Menezes       | CN       | Prof  | Internal Medicine              | MD, MMed (Int Med), Dip HIV Mang (SA), DTM&H, FCP (SA), Cert ID (SA), PhD          | M      | Absent  |
| Naidoo        | S        | Prof  | Public Health                  | MB BCh, DMTH, DHSM, DOH, MMED                                                      | M      | Absent  |
| Naran         | NH       | Dr    | Chemical Pathology             | PhD                                                                                | M      | Present |
| Penn          | C        | Prof  | Speech Pathology               | BA (Sp&HTh), PhD, CCC SL-P, OMS                                                    | F      | Absent  |
| Penny         | C        | Prof  | Internal Medicine              | BSc Hons, PhD                                                                      | M      | Present |
| Ross          | M        | Prof  | Public Health                  | MB ChB, FFCH(SA), FOM(UK)                                                          | F      | Absent  |
| Sanne         | IM       | Prof  | Infectious Diseases/HIV/TB     | MB BCh, FCP (SA), DTM&H; MMed & PhD                                                | M      | Absent  |
| Smith         | C        | Prof  | Psychiatry                     | BA, BA (Hons), M.A (Clin.Psych), PhD                                               | F      | Present |
| Stewart       | A        | Prof  | Physiotherapy                  | BSc (Physio), MSc, PhD, DPE                                                        | F      | Absent  |
| Szabo         | CP       | Prof  | Psychiatry                     | MB BCh, MMed, MScMed, PhD; FCPsych(SA)                                             | M      | Absent  |
| Thom          | RGM      | Prof  | Psychiatry                     | MB ChB, DCH, FCPsych, PhD                                                          | F      | Absent  |
| Tsotsi        | NM       | Dr    |                                | BDS; MPH; MSc Med; PGDiplnt ResEthics                                              | F      | Present |
| Velaphi       | S        | Prof  | Paediatrics                    | MB BCh, FCPaeds, MMed                                                              | M      | Present |
| Warria        | A        | Dr    | Social Work                    | D Litt et Phil (SWK)                                                               | F      | Absent  |
| Willem        | P        | Dr    | Human Genetics                 | MD, PhD                                                                            | F      | Absent  |
| Woodiwiss     | AJ       | Prof  | Cardiovascular Pathophysiology | BSc Physiotherapy, BSc, MSc, PhD                                                   | F      | Absent  |

### NOT AFFILIATED TO THE UNIVERSITY OF THE WITWATERSRAND

| Surname   | Initials | Title  | Discipline/s                  | Academic Qualifications            | Gender | Present |
|-----------|----------|--------|-------------------------------|------------------------------------|--------|---------|
| Barnabas  | N        | Ms     | Civil Society Liaison Officer | Community Liaison Manager          | F      | Present |
| Burns     | I        | Mr     | Community Representative      | MA (Hons)                          |        | Present |
| Egan      | A        | Father | Theology                      | BA (Hons), MA, MDiv, STL, PhD      | M      | Present |
| Guidozzi  | Y        | Adv    | Lawyer                        | BSc (Nurs), LLB, MBA               | F      | Present |
| Ikalafeng | B        | Dr     | Governance                    | BSc (Hons), MSc, PhD               | F      | Absent  |
| Langley   | G        | Prof   | Nursing                       | MSc (Nursing), PhD, MPhil (Ethics) | F      | Present |

|              |    |      |                          |                                                |            |        |
|--------------|----|------|--------------------------|------------------------------------------------|------------|--------|
| 011          |    |      |                          | 01:27:25                                       | 07-12-2017 | 7/7    |
| Mokhachane   | M  | Dr   | Community Representative | MB BCh, FCP (Paeds) SA, MMed, Neonatology (SA) | F          | Absent |
| Paruk        | F  | Prof | Anaesthesia              | MB ChB, FCOG(SA), Crit Care(SA), PhD           | F          | Absent |
| Peter        | JR | Adv  | Lawyer                   | BCom; LLB; LLM                                 | M          | Absent |
| Van Gelderen | CJ | Prof | Obstetrics & Gynaecology | MB BCh, FRCOG, FCOG(SA)                        | M          | Absent |

# **RETIRED MEMBER OCCASIONALLY CO-OPTED FOR SURGICAL OPINION ON A PROJECT**

|        |    |      |         |                          |   |
|--------|----|------|---------|--------------------------|---|
| Oettle | GJ | Prof | Surgery | BSc (Hons), MB BCh, FRCS | M |
|--------|----|------|---------|--------------------------|---|

**Note 1:** This committee has been in continuous operation since October 1966

**Note 2:** The large committee size is to ensure a good attendance at meetings

**Note 3:** A Quorum is 13 members according to the 33% of members on a committee with more than 15 members as required by SA National Guidelines (ref 2 below)

This is to certify that the Human Research Ethics Committee: (Medical) of the University of the Witwatersrand operates according to the following guidelines of good clinical practice:

1. ICH Harmonised Tripartite Guideline for Good Clinical Practice.
2. SA National Department of Health 2006 Guidelines for Good Practice in the Conduct of Clinical Trials with Human Participants in South Africa (2006).
3. Declaration of Helsinki 2013.

The Committee's United States Federal Wide Assurance details are:

1. Country code SF.
2. FWA Number: FWA00000715.
3. University of the Witwatersrand: IORG0000862.
4. Human Research Ethics Committee: (Medical): IRB00001223.

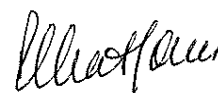

Supplement: Supplementary file 3 — Ethics approvals. (PDF 553 kb) [file 13063_2018_2928_MOESM3_ESM.pdf]
